# Supplementary material for: Analysis of Nucleotide Binding to P97 Reveals the Properties of a Tandem AAA Hexameric ATPase
Source: PubMed Central journal article supplement — J Biol Chem. 2008 May 16;283(20):13745–52. doi: 10.1074/jbc.M709632200 (PMC2376215; doi:10.1074/jbc.m709632200), 2008-05-16
Supplement: jbc_M709632200_1.pdf [file jbc_M709632200_1.pdf]

**SUPPLEMENTARY INFORMATION**

**Analysis of nucleotide binding to p97 reveals the properties  
of a tandem AAA hexameric ATPase**

Louise C Briggs, Geoff S Baldwin, Non Miyata, Hisao Kondo, Xiaodong Zhang,  
Paul S Freemont

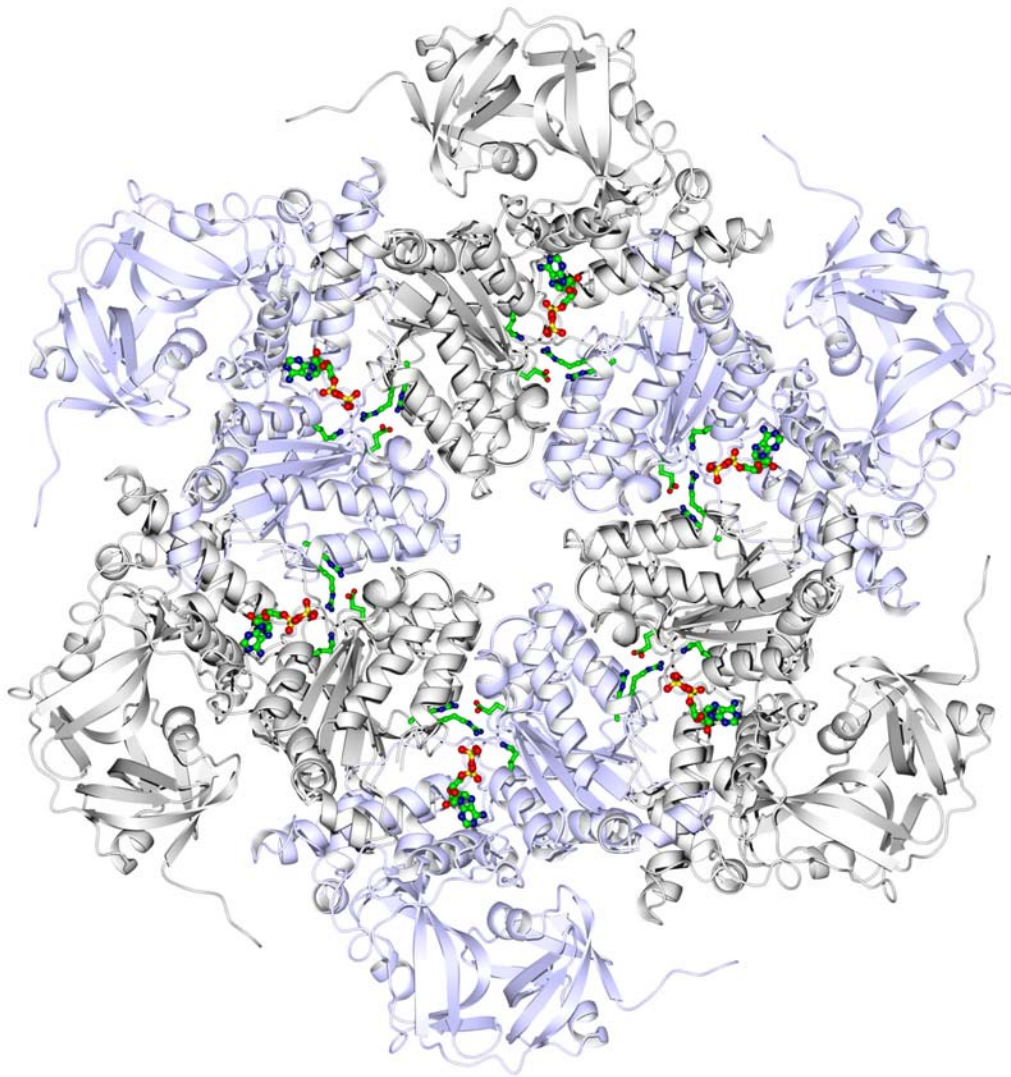

**Supplementary Figure 1. The crystal structure of p97 hexamer.** This view of the hexameric ring shows the D1 domains positioned in the centre of the ring making close inter-monomer contacts and the N domains at the periphery, protruding away from the ring. The D2 domains have similar structure to the D1 domains and are stacked behind the D1 domains in this orientation. The D1 active site is positioned at the monomer interface and is shown bound to ADP. The side chains of residues K251, E305, R359, R362 are also highlighted in ball and stick form.

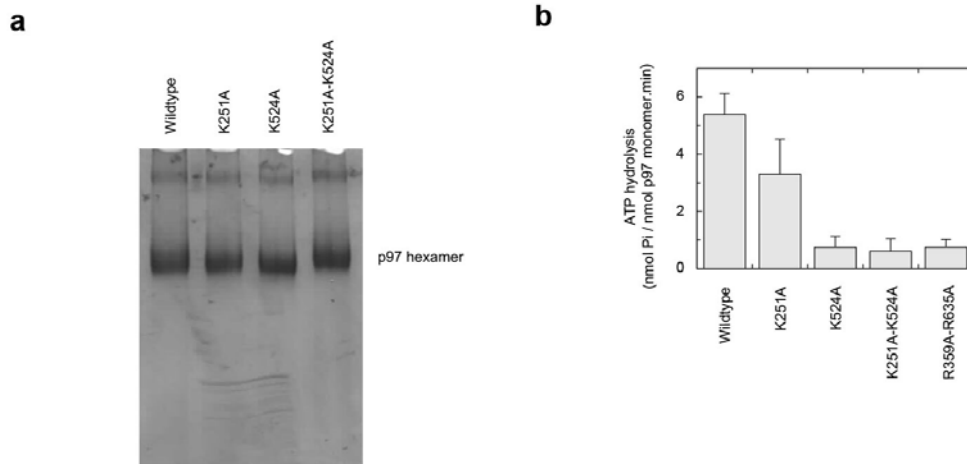

**Supplementary Figure 2. Characterization of mutant p97 preparations.** **a.** Non-denaturing gel demonstrating that mutations of the Walker A motif do not alter the oligomeric state of p97, as mutants have the same mobility as wildtype p97. The major band represents hexameric p97 and the faint higher band interpreted as a small population of p97 aggregates. **b.** The ATPase activity of wildtype p97 and Walker A and SRH mutants. When compared to wt p97, mutation of the D1 Walker A motif (K251A) decreased the activity by a third whereas mutation of the D2 Walker A motif (K524A and K251A-K524A) decreased the activity to below a fifth of wildtype p97. Mutation of an arginine residue of the SRH in D1 and D2 (R359A-R635A) similarly decreased ATPase activity suggesting that these residues are also key for ATP hydrolysis.

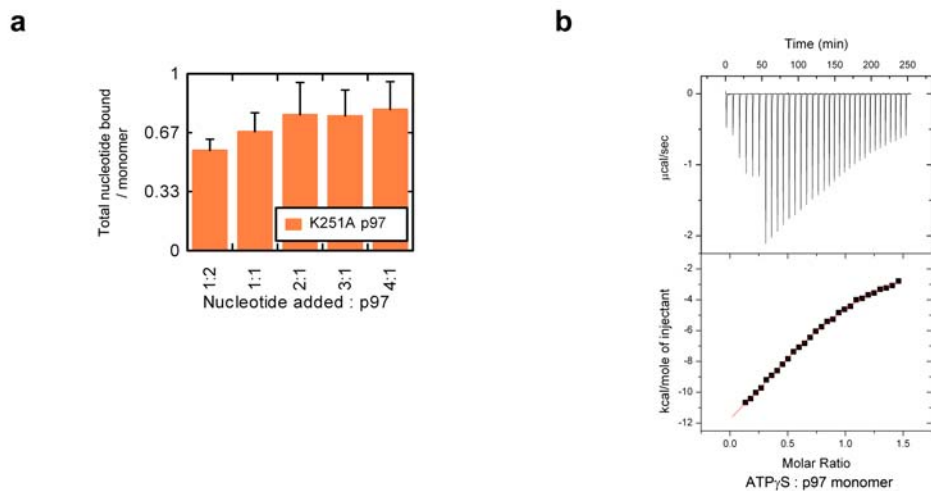

**Supplementary Figure 3. ATP $\gamma$ S binding to Walker A mutants of p97.**

**a.** Modified heat denaturation experiments when ATP $\gamma$ S is added show that p97 mutated in the D1 Walker A motif is likely to be saturated by 0.75 molecules nucleotide per monomer (4.5 molecules nucleotide per hexamer). This potentially represents ATP $\gamma$ S binding to the D2 domain and a small amount of ADP pre-bound to the mutated D1 domain. **b.** ITC data of ATP $\gamma$ S titrated against K251A-K524A p97 (625  $\mu$ M and 100  $\mu$ M respectively). The resulting diagonal ITC profile demonstrates that ATP $\gamma$ S binding was of low affinity due to Walker A mutation of both domains.

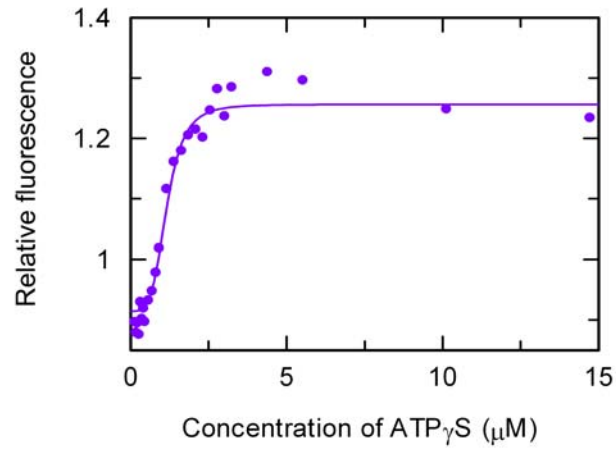

**Supplementary Figure 4. Tryptophan fluorescence of rat p97 when ATP $\gamma$ S is added.** ATP $\gamma$ S induced tryptophan fluorescence changes of p97 purified from rat tissue show a sigmoidal binding curve. Fitting to the cooperative binding equation indicates that the affinity of ATP $\gamma$ S binding is similar to recombinant p97 and the Hill coefficient indicates that cooperativity involves at least 4 monomers.

**Supplementary Table 1. Results from fits to ITC data.** ITC data was fitted to two site and competition models listed and the values derived from the best fits (lowest reduced  $\chi^2$ ) to multiple ITC experiments (n) were averaged (mean, standard deviations shown as +/-). The range of  $\chi^2$  values indicates the spread of best fits obtained for the multiple experiments averaged for each protein/ligand combination. To constrain fits to low affinity sites (e.g. wildtype binding ADP and K251A binding ATP $\gamma$ S) the stoichiometry is fixed at 1.

| p97                | Ligand                                   | Model       |                                            | N    | +/-  | $K_a$<br>( $M^{-1}$ ) | +/-   | $K_d$<br>( $\mu M$ ) | +/-  | $\Delta H$<br>( $kcal.mol^{-1}$ ) | +/- | n | Chi <sup>2</sup> Range |
|--------------------|------------------------------------------|-------------|--------------------------------------------|------|------|-----------------------|-------|----------------------|------|-----------------------------------|-----|---|------------------------|
| <b>Wildtype</b>    | <b>ADP</b>                               | Two site    | <b>D1 ADP</b>                              | 0.2  | 0.05 | 1.55E6                | 1.3E6 | 1.1                  | 0.8  | -9.2                              | 3.5 | 9 | 700 – 39200            |
|                    |                                          |             | <b>D2 ADP</b>                              | 1    | -    | 1.59E4                | 9.3E3 | 86                   | 51   | -6.5                              | 2   |   |                        |
| <b>K524A</b>       | <b>ATP<math>\gamma</math>S &amp; ADP</b> | Competition | <b>D1 ADP</b>                              | 1    | -    | 1.74E6                | 4.6E4 | 0.6                  | 0.15 | -11.8                             | 1.4 | 4 | 7300- 48700            |
|                    |                                          |             | <b>D1 ATP<math>\gamma</math>S</b>          | 1.05 | 0.04 | 5.04E5                | 1.3E5 | 2.1                  | 0.6  | -12.9                             | 0.8 |   |                        |
| <b>K251A</b>       | <b>ATP<math>\gamma</math>S</b>           | Two site    | <b>D2 ATP<math>\gamma</math>S</b>          | 1    | 0.2  | 4.5E5                 | 2.4E5 | 3                    | 2    | -9.9                              | 2.1 | 3 | 2900 – 9480            |
|                    |                                          |             | <b>D1 ATP<math>\gamma</math>S (K251A)</b>  | 1    | -    | 1.5E4                 | 6.1E3 | 74                   | 34   | -3.5                              | 1.2 |   |                        |
| <b>Wildtype</b>    | <b>ATP<math>\gamma</math>S &amp; ADP</b> | Competition | <b>D1 ADP</b>                              | 1    | -    | 1.2E6                 | -     | 0.85                 | -    | -11                               | 1.8 | 4 | 3360 – 61480           |
|                    |                                          |             | <b>D1 &amp; D2 ATP<math>\gamma</math>S</b> | 1.59 | 0.16 | 1.05E6                | 1.2E6 | 1.7                  | 0.9  | -9.2                              | 1   |   |                        |
| <b>R359A-R635A</b> | <b>ATP<math>\gamma</math>S &amp; ADP</b> | Competition | <b>D1 ADP</b>                              | 1    | -    | 2E6                   | -     | 0.5                  | -    | -59                               | 4.2 | 3 | 23240-42350            |
|                    |                                          |             | <b>D1 &amp; D2 ATP<math>\gamma</math>S</b> | 1.66 | 0.07 | 1.3E5                 | 2.9E4 | 7.8                  | 1.6  | -15.5                             | 4.4 |   |                        |

**Supplementary Table 2. Details of tryptophan fluorescence fitting data.** Data from multiple tryptophan fluorescence titrations (n) were fitted to a cooperative binding equation (one site binding equation in the case of R359A-R635A) and the mean and standard deviations (+/-) shown here. Values presented for K524A and K251A-K524A were calculated from fits to titrations of up to 1 mM ATP $\gamma$ S (experimental data not shown).

| <b>p97</b>                        | <b>K<sub>d</sub> (<math>\mu</math>M)</b> | <b>+/-</b> | <b><i>h</i></b> | <b>+/-</b> | <b>F<sub>max</sub></b> | <b>+/-</b> | <b>n</b> |
|-----------------------------------|------------------------------------------|------------|-----------------|------------|------------------------|------------|----------|
| <b>Wildtype</b>                   | 1                                        | 0.2        | 2.8             | 0.3        | 0.49                   | 0.08       | 4        |
| <b>Wildtype (apyrase treated)</b> | 1.3                                      | 0.3        | 3.6             | 0.8        | 0.49                   | 0.12       | 3        |
| <b>Wildtype (rat liver)</b>       | 1.1                                      | 0.2        | 4               | 0.1        | 0.36                   | 0.03       | 2        |
| <b>K251A</b>                      | 0.8                                      | 0.4        | 2.7             | 0.3        | 0.43                   | 0.21       | 4        |
| <b>K524A</b>                      | 235                                      | 122        | 1               | 0.1        | 0.28                   | 0.03       | 4        |
| <b>K251A-K524A</b>                | 164                                      | 60         | 1               | 0.3        | 0.25                   | 0.03       | 4        |
| <b>R359A-R635A</b>                | 1.9                                      | 0.6        | -               | -          | 0.32                   | 0.1        | 3        |

**Supplementary Table 3. A summary of the properties of p97 and mutants of the Walker A and SRH motifs.** Ranges given indicate the spread of results from multiple techniques and \* indicates values fixed in fitting.

| p97                | Mutation effect                                  |           | Pre-bound ADP | ADP           |    | ATP $\gamma$ S |           | Trp Fluorescence |          | ATPase            |
|--------------------|--------------------------------------------------|-----------|---------------|---------------|----|----------------|-----------|------------------|----------|-------------------|
|                    |                                                  |           | (ADP/monomer) | Kd ( $\mu$ M) | N  | Kd ( $\mu$ M)  | N         | Kd ( $\mu$ M)    | <i>h</i> | Specific activity |
| <b>Wildtype</b>    | n/a                                              | <b>D1</b> | 0.9           | 0.5 - 1.5     | 1  | 2              | 1         | -                | -        | 5.4               |
|                    |                                                  | <b>D2</b> | -             | 90            | 1* | 2              | 0.5 - 0.6 | 1 - 1.3          | 2.8 - 4  |                   |
| <b>K251A</b>       | Walker A                                         | <b>D1</b> | 0.2           | -             | -  | 74             | 1*        | -                | -        | 3.3               |
|                    | Reduces nucleotide binding affinity in D1        | <b>D2</b> | -             | -             | -  | 3              | 0.65 - 1  | 0.8              | 2.7      |                   |
| <b>K524A</b>       | Walker A                                         | <b>D1</b> | 1.1           | 0.6           | 1* | 2.1            | 1.05      | -                | -        | 0.7               |
|                    | Reduces nucleotide binding affinity in D2        | <b>D2</b> | -             | -             | -  | -              | -         | 235              | 1        |                   |
| <b>K251A-K524A</b> | Walker A                                         | <b>D1</b> | 0.2           | -             | -  | -              | -         | -                | -        | 0.6               |
|                    | Reduces nucleotide binding affinity in D1 and D2 | <b>D2</b> | -             | -             | -  | -              | -         | 164              | 1        |                   |
| <b>R359A-R635A</b> | SRH                                              | <b>D1</b> | 0.9           | 0.5           | 1* | 7.8            | 1*        | -                | -        | 0.7               |
|                    | No cooperative conformational change in AAA ring | <b>D2</b> | -             | -             | -  | 7.8            | 0.66      | 1.9              | -        |                   |



## SUPPLEMENTARY METHODS

### ATPase activity assay

Inorganic phosphate produced by ATP hydrolysis was detected by a colorimetric assay as described previously <sup>1,2</sup>. Briefly, a 1 ml reaction mixture of 1  $\mu$ M of p97 monomers was equilibrated at 37 °C and 3 mM ATP was added to start the reaction. 100  $\mu$ l aliquots were removed at time points over 30 min and mixed with 900  $\mu$ l colour mixture (6 mM Ammonium Molybdate, 450 mM H<sub>2</sub>SO<sub>4</sub>, 0.06% Polyvinyl Alcohol, 120  $\mu$ M Malachite Green). Colouration of each aliquot was allowed to develop over 20 min and then stabilised with 100  $\mu$ l 3.4% Citric Acid. Absorbance measurements at 600 nm were taken and plotted against time. The gradient of the linearly related points (abs/min) was converted to moles phosphate (Pi) by a standard curve, factored for dilution and concentration to give nmol Pi/(nmol p97 monomer.min).

### Purification of rat liver p97

Rat p97 was purified as previously described <sup>3</sup> concentrated up to ~10 g/l using Centricon-30 (Amicon), and dialyzed against the following buffer: 50 mM Tris, 150 mM KCl, 20 mM MgCl<sub>2</sub>, 2 mM EDTA, 1 mM DTT, 5% glycerol, pH 8. No nucleotide was added into the buffers during the above purification steps and binding experiments were carried out in the same buffer as other experiments.

## REFERENCES

1. Song, C., Wang, Q. & Li, C.C. ATPase activity of p97-valosin-containing protein (VCP). D2 mediates the major enzyme activity, and D1 contributes to the heat-induced activity. *J Biol Chem* 278, 3648-55 (2003).
2. Cogan, E.B., Birrell, G.B. & Griffith, O.H. A robotics-based automated assay for inorganic and organic phosphates. *Anal Biochem* 271, 29-35 (1999).
3. Rabouille, C., Levine, T.P., Peters, J.M. & Warren, G. An NSF-like ATPase, p97, and NSF mediate cisternal regrowth from mitotic Golgi fragments. *Cell* 82, 905-14 (1995).
